# Supplementary material for: Does quality of drinking water matter in kidney stone disease: A study in West Bengal, India
Source: PubMed Central journal article supplement — Investig Clin Urol. 2018 Apr 24;59(3):158–65. doi: 10.4111/icu.2018.59.3.158 (PMC5934277; doi:10.4111/icu.2018.59.3.158), 2018-04-24
Supplement: icu-59-158-s001.pdf [file icu-59-158-s001.pdf]

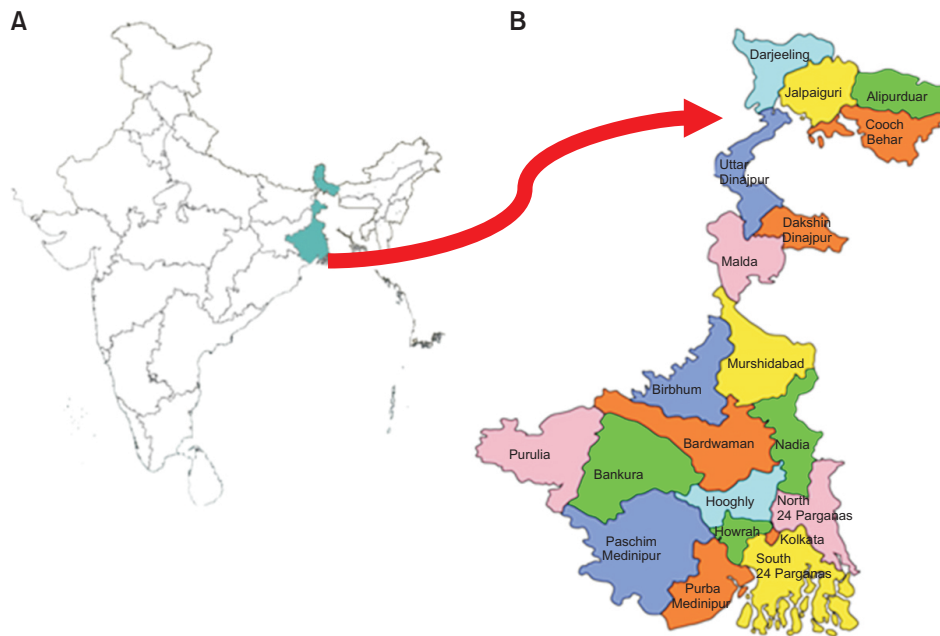

**Supplementary Fig. 1.** (A) Geographic location of West Bengal (State) in India (Country). (B) All the districts of West Bengal.
