# Supplementary material for: Does quality of drinking water matter in kidney stone disease: A study in West Bengal, India
Source: PubMed Central journal article supplement — Investig Clin Urol. 2018 Apr 24;59(3):158–65. doi: 10.4111/icu.2018.59.3.158 (PMC5934277; doi:10.4111/icu.2018.59.3.158), 2018-04-24
Supplement: icu-59-158-s002.pdf [file icu-59-158-s002.pdf]

**Supplementary Table 1.** Parameters of drinking water sample collected from each case area and control area

| Place                                                   | Area with maximum stone prevalence (case area) |                                          |           |                   |                                         |                |                                                       | Control area |                                          |           |                   |                                         |                |  |
|---------------------------------------------------------|------------------------------------------------|------------------------------------------|-----------|-------------------|-----------------------------------------|----------------|-------------------------------------------------------|--------------|------------------------------------------|-----------|-------------------|-----------------------------------------|----------------|--|
|                                                         | pH                                             | Conductivity ( $\mu\text{S}/\text{cm}$ ) | TDS (ppm) | Alkalinity (mg/L) | Hardness (mg $\text{CaCO}_3/\text{L}$ ) | Salinity (ppm) | Place                                                 | pH           | Conductivity ( $\mu\text{S}/\text{cm}$ ) | TDS (ppm) | Alkalinity (mg/L) | Hardness (mg $\text{CaCO}_3/\text{L}$ ) | Salinity (ppm) |  |
| <b>Jalpaiguri &amp; Alipurduar</b>                      |                                                |                                          |           |                   |                                         |                |                                                       |              |                                          |           |                   |                                         |                |  |
| Bhaktinagar<br>(26.68° N, 88.42° E)<br>(Altitude 112 m) | 7.64                                           | 341                                      | 241       | 55                | 110                                     | 163            | Nagrakata<br>(26.73° N, 88.43° E)<br>(Altitude 132 m) | 7.6          | 395                                      | 324       | 80                | 140                                     | 185            |  |
| <b>Malda</b>                                            |                                                |                                          |           |                   |                                         |                |                                                       |              |                                          |           |                   |                                         |                |  |
| Kaliachak<br>(24.86° N, 87.98° E)<br>(Altitude 27 m)    | 7.6                                            | 920                                      | 540       | 170               | 190                                     | 212            | Begamganj<br>(25.13° N, 87.92° E)<br>(Altitude 32 m)  | 7.9          | 705                                      | 486       | 165               | 170                                     | 275            |  |
| Ratua<br>(25.20° N, 87.93° E)<br>(Altitude 33 m)        | 7.9                                            | 756                                      | 485       | 155               | 185                                     | 295            | Gajol<br>(25.21° N, 88.19° E)<br>(Altitude 44 m)      | 8.1          | 875                                      | 520       | 165               | 195                                     | 240            |  |
| <b>Bardwaman</b>                                        |                                                |                                          |           |                   |                                         |                |                                                       |              |                                          |           |                   |                                         |                |  |
| Memari<br>(23.18° N, 88.11° E)<br>(Altitude 25 m)       | 7.62                                           | 490                                      | 348       | 80                | 140                                     | 220            | Durgapur<br>(23.52° N, 87.31° E)<br>(Altitude 108 m)  | 7.2          | 345                                      | 245       | 135               | 230                                     | 165            |  |
| Purbasthali<br>(23.46° N, 88.33° E)<br>(Altitude 18 m)  | 7.96                                           | 610                                      | 406       | 125               | 110                                     | 234            |                                                       |              |                                          |           |                   |                                         |                |  |
| Kalna<br>(23.23° N, 88.36° E)<br>(Altitude 16 m)        | 7.51                                           | 525                                      | 392       | 95                | 135                                     | 190            |                                                       |              |                                          |           |                   |                                         |                |  |
| <b>Birbhum</b>                                          |                                                |                                          |           |                   |                                         |                |                                                       |              |                                          |           |                   |                                         |                |  |
| Murarai<br>(24.44° N, 87.85° E)<br>(Altitude 35 m)      | 7.15                                           | 536                                      | 624       | 110               | 220                                     | 241            | Rampurhat<br>(24.18° N, 87.78° E)<br>(Altitude 39 m)  | 7.32         | 730                                      | 518       | 95                | 195                                     | 356            |  |
| Suri<br>(23.92° N, 87.55° E)<br>(Altitude 67 m)         | 7.52                                           | 710                                      | 576       | 150               | 165                                     | 210            |                                                       |              |                                          |           |                   |                                         |                |  |
| <b>Bankura</b>                                          |                                                |                                          |           |                   |                                         |                |                                                       |              |                                          |           |                   |                                         |                |  |
| Barjora<br>(23.43° N, 87.28° E)<br>(Altitude 84 m)      | 7.62                                           | 556                                      | 620       | 150               | 210                                     | 276            | Ratanpur<br>(23.11° N, 87.07° E)<br>(Altitude 114 m)  | 7.82         | 210                                      | 362       | 65                | 190                                     | 165            |  |
| <b>Purulia</b>                                          |                                                |                                          |           |                   |                                         |                |                                                       |              |                                          |           |                   |                                         |                |  |
| Hura<br>(23.30° N, 86.82° E)<br>(Altitude 150 m)        | 7.46                                           | 585                                      | 544       | 145               | 190                                     | 320            | Nowahati<br>23.44° N, 86.59° E<br>(Altitude 209 m)    | 8.02         | 225                                      | 375       | 45                | 140                                     | 110            |  |

Supplementary Table 1. Continued

| Place                                                     | Area with maximum stone prevalence (case area) |                                   |           |                   |                                         |                | Control area |                                   |           |                   |                                         |                |
|-----------------------------------------------------------|------------------------------------------------|-----------------------------------|-----------|-------------------|-----------------------------------------|----------------|--------------|-----------------------------------|-----------|-------------------|-----------------------------------------|----------------|
|                                                           | pH                                             | Conductivity ( $\mu\text{S/cm}$ ) | TDS (ppm) | Alkalinity (mg/L) | Hardness (mg $\text{CaCO}_3/\text{L}$ ) | Salinity (ppm) | pH           | Conductivity ( $\mu\text{S/cm}$ ) | TDS (ppm) | Alkalinity (mg/L) | Hardness (mg $\text{CaCO}_3/\text{L}$ ) | Salinity (ppm) |
| Hooghly                                                   |                                                |                                   |           |                   |                                         |                |              |                                   |           |                   |                                         |                |
| Khanakul<br>(22.71° N, 87.85° E)<br>(Altitude 13 m)       | 7.46                                           | 545                               | 555       | 135               | 140                                     | 275            | 7.6          | 686                               | 487       | 105               | 125                                     | 235            |
| Serampur<br>(22.75° N, 88.34° E)<br>(Altitude 10 m)       | 7.65                                           | 620                               | 495       | 130               | 165                                     | 245            | 7.56         | 520                               | 414       | 130               | 190                                     | 214            |
| Chinsurah<br>(22.89° N, 88.41° E)<br>(Altitude 17 m)      | 7.82                                           | 668                               | 520       | 170               | 180                                     | 302            | 7.4          | 756                               | 524       | 100               | 180                                     | 276            |
| Purba Medinipur                                           |                                                |                                   |           |                   |                                         |                |              |                                   |           |                   |                                         |                |
| Egra<br>(21.70° N, 87.56° E)<br>(Altitude 6 m)            | 7.75                                           | 635                               | 482       | 140               | 155                                     | 345            | 7.89         | 782                               | 512       | 125               | 165                                     | 210            |
| Paschim Medinipur                                         |                                                |                                   |           |                   |                                         |                |              |                                   |           |                   |                                         |                |
| Keshpur<br>(22.55° N, 87.45° E)<br>(Altitude 25 m)        | 7.88                                           | 625                               | 512       | 130               | 165                                     | 296            | 7.82         | 456                               | 375       | 130               | 150                                     | 205            |
| Kharagpur<br>(22.32° N, 87.31° E)<br>(Altitude 54 m)      | 7.03                                           | 670                               | 476       | 120               | 140                                     | 318            | 7.96         | 170                               | 210       | 60                | 85                                      | 135            |
| Nadia                                                     |                                                |                                   |           |                   |                                         |                |              |                                   |           |                   |                                         |                |
| Chakdaha<br>(23.07° N, 88.52° E)<br>(Altitude 15 m)       | 7.56                                           | 542                               | 545       | 145               | 175                                     | 320            | 7.68         | 715                               | 456       | 115               | 160                                     | 465            |
| Murshidabad                                               |                                                |                                   |           |                   |                                         |                |              |                                   |           |                   |                                         |                |
| Raghunathgunge<br>(24.46° N, 88.06° E)<br>(Altitude 28 m) | 7.68                                           | 688                               | 445       | 135               | 150                                     | 605            | 7.94         | 865                               | 620       | 210               | 290                                     | 320            |
| Berhampur<br>(24.10° N, 88.27° E)<br>(Altitude 22 m)      | 7.52                                           | 660                               | 463       | 300               | 350                                     | 317            | 7.69         | 445                               | 302       | 105               | 130                                     | 220            |
| Domkal<br>(24.12° N, 88.66° E)<br>(Altitude 22 m)         | 7.8                                            | 545                               | 510       | 105               | 210                                     | 235            |              |                                   |           |                   |                                         |                |

Supplementary Table 1. Continued

| Place                                                 | Area with maximum stone prevalence (case area) |                                   |           |                   |                                    |                | Control area |                                   |           |                   |                                    |                |
|-------------------------------------------------------|------------------------------------------------|-----------------------------------|-----------|-------------------|------------------------------------|----------------|--------------|-----------------------------------|-----------|-------------------|------------------------------------|----------------|
|                                                       | pH                                             | Conductivity ( $\mu\text{S/cm}$ ) | TDS (ppm) | Alkalinity (mg/L) | Hardness (mg CaCO <sub>3</sub> /L) | Salinity (ppm) | pH           | Conductivity ( $\mu\text{S/cm}$ ) | TDS (ppm) | Alkalinity (mg/L) | Hardness (mg CaCO <sub>3</sub> /L) | Salinity (ppm) |
| Howrah                                                |                                                |                                   |           |                   |                                    |                |              |                                   |           |                   |                                    |                |
| Sankrail<br>(22.56° N, 88.23° E<br>(Altitude 8 m))    | 7.86                                           | 675                               | 510       | 110               | 155                                | 375            | 8.4          | 815                               | 581       | 80                | 190                                | 402            |
| Domjur<br>(22.63° N, 88.22° E<br>(Altitude 10 m))     | 7.54                                           | 630                               | 456       | 95                | 150                                | 310            |              |                                   |           |                   |                                    |                |
| North 24 Parganas                                     |                                                |                                   |           |                   |                                    |                |              |                                   |           |                   |                                    |                |
| Ashoknagar<br>(22.83° N, 88.63° E<br>(Altitude 17 m)) | 7.9                                            | 631                               | 448       | 155               | 200                                | 308            | 7.6          | 692                               | 432       | 135               | 240                                | 290            |
| Basirhat<br>(22.66° N, 88.87° E<br>(Altitude 13 m))   | 8.0                                            | 985                               | 520       | 140               | 210                                | 420            | 7.64         | 735                               | 602       | 140               | 175                                | 315            |
| Habra<br>(22.85° N, 88.66° E<br>(Altitude 13 m))      | 7.5                                            | 776                               | 495       | 125               | 335                                | 380            | 7.8          | 758                               | 557       | 135               | 210                                | 375            |
| Barasat<br>(22.72° N, 88.48° E<br>(Altitude 15 m))    | 7.42                                           | 774                               | 549       | 155               | 200                                | 378            | 7.7          | 1,045                             | 740       | 120               | 180                                | 515            |
| South 24 Parganas                                     |                                                |                                   |           |                   |                                    |                |              |                                   |           |                   |                                    |                |
| Maheshtala<br>(22.51° N, 88.25° E<br>(Altitude 8 m))  | 7.82                                           | 284                               | 201       | 50                | 80                                 | 138            | 8.04         | 975                               | 620       | 140               | 185                                | 265            |
| Sonarpur<br>(22.45° N, 88.39° E<br>(Altitude 8 m))    | 7.94                                           | 866                               | 612       | 80                | 180                                | 422            |              |                                   |           |                   |                                    |                |
| Budgebudge<br>(22.46° N, 88.17° E<br>(Altitude 7 m))  | 7.58                                           | 810                               | 970       | 140               | 225                                | 190            | 8.22         | 652                               | 572       | 165               | 190                                | 280            |
| Canning<br>(22.31° N, 88.66° E<br>(Altitude 7 m))     | 8.12                                           | 1,096                             | 773       | 145               | 500                                | 555            | 8.4          | 315                               | 223       | 55                | 120                                | 152            |
| Baruipur<br>(22.40° N, 88.43° E<br>(Altitude 10 m))   | 7.62                                           | 1,310                             | 928       | 170               | 245                                | 654            |              |                                   |           |                   |                                    |                |

Supplementary Table 1. Continued

| Place                                                 | Area with maximum stone prevalence (case area) |                                          |           |                   |                                         |                |                                                      | Control area |                                          |           |                   |                                         |                |  |
|-------------------------------------------------------|------------------------------------------------|------------------------------------------|-----------|-------------------|-----------------------------------------|----------------|------------------------------------------------------|--------------|------------------------------------------|-----------|-------------------|-----------------------------------------|----------------|--|
|                                                       | pH                                             | Conductivity ( $\mu\text{S}/\text{cm}$ ) | TDS (ppm) | Alkalinity (mg/L) | Hardness (mg $\text{CaCO}_3/\text{L}$ ) | Salinity (ppm) | Place                                                | pH           | Conductivity ( $\mu\text{S}/\text{cm}$ ) | TDS (ppm) | Alkalinity (mg/L) | Hardness (mg $\text{CaCO}_3/\text{L}$ ) | Salinity (ppm) |  |
| Kolkata                                               |                                                |                                          |           |                   |                                         |                |                                                      |              |                                          |           |                   |                                         |                |  |
| Bhawanipur<br>(22.54° N, 88.35° E)<br>(Altitude 11 m) | 8.2                                            | 825                                      | 440       | 100               | 140                                     | 252            | Maniktala<br>(22.59° N, 88.38° E)<br>(Altitude 8 m)  | 8.3          | 345                                      | 245       | 190               | 245                                     | 166            |  |
| Khidderpore<br>(22.54° N, 88.32° E)<br>(Altitude 9 m) | 7.96                                           | 720                                      | 410       | 120               | 135                                     | 208            | Baghbazar<br>(22.60° N, 88.36° E)<br>(Altitude 12 m) | 7.64         | 785                                      | 544       | 205               | 250                                     | 368            |  |
| Alipur<br>(22.52° N, 88.33° E)<br>(Altitude 15 m)     | 8.1                                            | 765                                      | 386       | 110               | 150                                     | 195            | Jadavpur<br>(22.49° N, 88.37° E)<br>(Altitude 11 m)  | 8.04         | 443                                      | 314       | 140               | 160                                     | 211            |  |
| Kalighat<br>(22.52° N, 88.34° E)<br>(Altitude 9 m)    | 8.16                                           | 810                                      | 452       | 110               | 140                                     | 265            | Garia<br>(22.46° N, 88.40° E)<br>(Altitude 6 m)      | 8.8          | 345                                      | 245       | 105               | 125                                     | 166            |  |

TDS, total dissolved solutes.
